# Supplementary material
Source: publisher site journal article supplement (https://www.dovepress.com/article/276530)
Supplement: Supplementary file 1 [file get_supplementary_file.php]

**Supplementary material.** Table S1: Ischemia-reperfusion organs injury, clinical manifestations and syndromes-like

| DISEASE GRADE SEVERITY | LUNG                                                                               | LIVER                   | NERVE                                                                | SKIN                                                                    | KIDNEY                                    | HEART                                                                   | GUT                                                                    | BRAIN                                                                                                                                                | RETINA                                                   | EAR                                  | GENITAL | LYMPHO-HEMATO-POYETIC SYSTEM                   | JOINTS                                         |
|------------------------|------------------------------------------------------------------------------------|-------------------------|----------------------------------------------------------------------|-------------------------------------------------------------------------|-------------------------------------------|-------------------------------------------------------------------------|------------------------------------------------------------------------|------------------------------------------------------------------------------------------------------------------------------------------------------|----------------------------------------------------------|--------------------------------------|---------|------------------------------------------------|------------------------------------------------|
| MILD                   | Dyspnea                                                                            |                         | HYPOSIMIA/<br>DYSGEUSIA                                              | ATYPICAL<br>RAYNAUD<br>PHENOMENON/<br>PSEUDO-PERNIO                     | INFLAMMATORY<br>LOIN PAIN/<br>RENAL COLIC |                                                                         | DIARRHEA/<br>ABDOMINAL<br>PAIN/<br>APENDICULAR<br>SD/<br>CHOLECISTITIS | CEFALEA                                                                                                                                              | REVERSIBLE<br>BRANCH<br>RETINAL<br>ARTERIAL<br>OCCLUSION | SUSAC SD/<br>OTALGIA/<br>INSTABILITY | ULCER   | HEAD<br>AND<br>NECK<br>LYMPH-<br>ADENOPATHY    | FEMORAL<br>CONDYLE<br>ISCHAEMIA/<br>ARTH-ALGIA |
| MODERATE               | ACUTE<br>RESPIRATORY<br>INSUFFICIENCY/<br>PLATYPNEA<br>ORTODEOXIA SD/<br>AIR LEAKS | HYPER-<br>GLYCEMIA      |                                                                      | SEVERE<br>MICRO-<br>CIRCULATORY<br>ISCHEMIA WITH<br>PRESERVED<br>PULSES | HEMATURIA                                 | MIOCARDITIS/<br>AURICULAR<br>FIBRILLATION/<br>LONG QT /<br>HYPERKALEMIA | HYPOPROTEINEMIA/<br>MALNUTRITION/<br>HYPONATREMIA                      | CONFUSION /<br>SNEDDON SD                                                                                                                            | PETEQUIAL<br>BLEEDING                                    |                                      |         | ANEMIA/<br>LYMPHOPENIA<br>POST-<br>REPERFSUION |                                                |
| CRITICAL               | ACUTE<br>RESPIRATORY<br>INSUFFICIENCY<br>OXYGEN THERAPY<br>REFRACTORY              | LIVER<br>IN-SUFFICIENCY | MOTOR<br>PERIPHERAL<br>NEUROPATHY/<br>GUILLAIN-<br>BARRÉ<br>SYNDROME | DRY<br>GANGRENE<br>WITH<br>ARTERIO-<br>SCLEROSIS<br>OBLITERANS          | ACUTE<br>KIDNEY<br>INJURY                 | BRUGADA/<br>TAKO-TSUBO SDs                                              | MICRO-BLEEDING/<br>PERFORATION                                         | OCCLUSION OF<br>THE ARTERY OF<br>PERCHERON/<br>ISCHEMIC<br>LESSIONS OF THE<br>MIDDLE<br>CEREBRAL ARTERY<br>AREA WITHOUT<br>BASAL GANGLIA<br>AFFECTED |                                                          |                                      |         | BY-CITOPENIA/<br>PAN-CITOPENIA                 |                                                |
